# Supplementary material for: Generalizable Long COVID Subtypes: Findings from the NIH N3C and RECOVER Programs
Source: bioRxiv or medRxiv preprint supplement (doi:10.1101/2022.05.24.22275398), 2022-07-20
Supplement: Supplementary file [file media-1.pdf]

**Table S1.** Neuropsychiatric HPO terms that were observed (✓) or not (-) in the EHR data.

|    | <b>Term</b>                                           | <b>observed?</b> |
|----|-------------------------------------------------------|------------------|
| 1  | Aphasia (HP:0002381)                                  | ✓                |
| 2  | Slurred speech (HP:0001350)                           | ✓                |
| 3  | Agnosia (HP:0010524)                                  | ✓                |
| 4  | Confusion (HP:0001289)                                | ✓                |
| 5  | Encephalopathy (HP:0001298)                           | ✓                |
| 6  | Headache (HP:0002315)                                 | ✓                |
| 7  | Migraine (HP:0002076)                                 | ✓                |
| 8  | Anosmia (HP:0000458)                                  | ✓                |
| 9  | Parageusia (HP:0031249)                               | ✓                |
| 10 | Depression (HP:0000716)                               | ✓                |
| 11 | Memory impairment (HP:0002354)                        | ✓                |
| 12 | Attention deficit hyperactivity disorder (HP:0007018) | ✓                |
| 13 | Auditory hallucinations (HP:0008765)                  | ✓                |
| 14 | Hallucinations (HP:0000738)                           | ✓                |
| 15 | Visual hallucinations (HP:0002367)                    | ✓                |
| 16 | Abnormal reflex (HP:0031826)                          | ✓                |
| 17 | Abnormality of movement (HP:0100022)                  | ✓                |
| 18 | Ataxia (HP:0001251)                                   | ✓                |
| 19 | Dysarthria (HP:0001260)                               | ✓                |
| 20 | Dysphagia (HP:0002015)                                | ✓                |
| 21 | Dystonia (HP:0001332)                                 | ✓                |
| 22 | Hyperesthesia (HP:0100963)                            | ✓                |
| 23 | Hyperkinetic movements (HP:0002487)                   | ✓                |
| 24 | Muscle weakness (HP:0001324)                          | ✓                |
| 25 | Orthostatic hypotension (HP:0001278)                  | ✓                |
| 26 | Paresthesia (HP:0003401)                              | ✓                |
| 27 | Polyneuropathy (HP:0001271)                           | ✓                |
| 28 | Seizure (HP:0001250)                                  | ✓                |
| 29 | Skeletal muscle atrophy (HP:0003202)                  | ✓                |
| 30 | Somatic sensory dysfunction (HP:0003474)              | ✓                |
| 31 | Tremor (HP:0001337)                                   | ✓                |
| 32 | Insomnia (HP:0100785)                                 | ✓                |
| 33 | Restless legs (HP:0012452)                            | ✓                |
| 34 | Sleep apnea (HP:0010535)                              | ✓                |
| 35 | Anomic aphasia (HP:0030784)                           | -                |
| 36 | Bilingual aphasia (HP:0033849)                        | -                |
| 37 | Expressive aphasia (HP:0002427)                       | -                |
| 38 | Receptive aphasia (HP:0033848)                        | -                |
| 39 | Bradykinesia (HP:0002067)                             | -                |
| 40 | Bradyphrenia (HP:0031843)                             | -                |
| 41 | Cognitive impairment (HP:0100543)                     | -                |
| 42 | Diminished ability to concentrate (HP:0031987)        | -                |
| 43 | Tachyphrenia (HP:0033844)                             | -                |
| 44 | Ageusia (HP:0041051)                                  | -                |
| 45 | Hypogeusia (HP:0000224)                               | -                |
| 46 | Hyposmia (HP:0004409)                                 | -                |

Continued on next page

**Table S1 – continued from previous page**

|    | <b>Term</b>                                   | <b>observed?</b> |
|----|-----------------------------------------------|------------------|
| 47 | Phantageusia (HP:0033847)                     | -                |
| 48 | Phantosmia (HP:0033693)                       | -                |
| 49 | Aggressive behavior (HP:0000718)              | -                |
| 50 | Dysphoria (HP:0033838)                        | -                |
| 51 | Emotional lability (HP:0000712)               | -                |
| 52 | Euphoria (HP:0031844)                         | -                |
| 53 | Mania (HP:0100754)                            | -                |
| 54 | Sense of impending doom (HP:0033845)          | -                |
| 55 | Suicidal ideation (HP:0031589)                | -                |
| 56 | Tearfulness (HP:0033705)                      | -                |
| 57 | Anterograde memory impairment (HP:0033689)    | -                |
| 58 | Long term memory impairment (HP:0033688)      | -                |
| 59 | Procedural memory loss (HP:0033691)           | -                |
| 60 | Short term memory impairment (HP:0033687)     | -                |
| 61 | Anxiety (HP:0000739)                          | -                |
| 62 | Apathy (HP:0000741)                           | -                |
| 63 | Brain fog (HP:0033630)                        | -                |
| 64 | Delusions (HP:0000746)                        | -                |
| 65 | Impaired executive functioning (HP:0033051)   | -                |
| 66 | Impulsivity (HP:0100710)                      | -                |
| 67 | Irritability (HP:0000737)                     | -                |
| 68 | Panic attack (HP:0025269)                     | -                |
| 69 | Phonophobia (HP:0002183)                      | -                |
| 70 | Polydipsia (HP:0001959)                       | -                |
| 71 | Posttraumatic stress symptom (HP:0033676)     | -                |
| 72 | Short attention span (HP:0000736)             | -                |
| 73 | Tactile hallucination (HP:0033694)            | -                |
| 74 | Abnormal exteroceptive sensation (HP:0033747) | -                |
| 75 | Babinski sign (HP:0003487)                    | -                |
| 76 | Dysmetria (HP:0001310)                        | -                |
| 77 | Facial paralysis (HP:0007209)                 | -                |
| 78 | Frontal release signs (HP:0000743)            | -                |
| 79 | Gait disturbance (HP:0001288)                 | -                |
| 80 | Hand muscle weakness (HP:0030237)             | -                |
| 81 | Hypoesthesia (HP:0033748)                     | -                |
| 82 | Hypotonia (HP:0001252)                        | -                |
| 83 | Muscle spasm (HP:0003394)                     | -                |
| 84 | Parkinsonism (HP:0001300)                     | -                |
| 85 | Rigidity (HP:0002063)                         | -                |
| 86 | Spasticity (HP:0001257)                       | -                |
| 87 | Unilateral facial palsy (HP:0012799)          | -                |
| 88 | Maintenance insomnia (HP:0031355)             | -                |
| 89 | Sleep disturbance (HP:0002360)                | -                |
| 90 | Sleep onset insomnia (HP:0031354)             | -                |
| 91 | Terminal insomnia (HP:0031356)                | -                |

**Table S2.** ENT HPO terms that were observed (✓) or not (-) in the EHR data.

|     | <b>Term</b>                     | <b>observed?</b> |
|-----|---------------------------------|------------------|
| 92  | Nasal congestion (HP:0001742)   | ✓                |
| 93  | Pharyngalgia (HP:0033050)       | ✓                |
| 94  | Ear pain (HP:0030766)           | ✓                |
| 95  | Hearing impairment (HP:0000365) | ✓                |
| 96  | Hyperacusis (HP:0010780)        | ✓                |
| 97  | Tinnitus (HP:0000360)           | ✓                |
| 98  | Vertigo (HP:0002321)            | ✓                |
| 99  | Dysphonia (HP:0001618)          | -                |
| 100 | Rhinitis (HP:0012384)           | -                |
| 101 | Pulsatile tinnitus (HP:0008629) | -                |

**Table S3.** Skin HPO terms that were observed (✓) or not (-) in the EHR data.

|     | <b>Term</b>                           | <b>observed?</b> |
|-----|---------------------------------------|------------------|
| 102 | Dermatographic urticaria (HP:0011971) | ✓                |
| 103 | Skin rash (HP:0000988)                | ✓                |
| 104 | Alopecia (HP:0001596)                 | -                |
| 105 | Flushing (HP:0031284)                 | -                |
| 106 | Fragile nails (HP:0001808)            | -                |
| 107 | Hyperhidrosis (HP:0000975)            | -                |
| 108 | Petechiae (HP:0000967)                | -                |
| 109 | Pruritus (HP:0000989)                 | -                |
| 110 | Pseudo-chilblain (HP:0033696)         | -                |
| 111 | Scaling skin (HP:0040189)             | -                |

**Table S4. Pulmonary HPO terms that were observed (✓) or not (-) in the EHR data.**

|     | Term                                                                    | observed? |
|-----|-------------------------------------------------------------------------|-----------|
| 112 | Atelectasis (HP:0100750)                                                | ✓         |
| 113 | Bronchiectasis (HP:0002110)                                             | ✓         |
| 114 | Pulmonary fibrosis (HP:0002206)                                         | ✓         |
| 115 | Hypoxemia (HP:0012418)                                                  | ✓         |
| 116 | Pleuritis (HP:0002102)                                                  | ✓         |
| 117 | Pulmonary embolism (HP:0002204)                                         | ✓         |
| 118 | Cough (HP:0012735)                                                      | ✓         |
| 119 | Dyspnea (HP:0002094)                                                    | ✓         |
| 120 | Hemoptysis (HP:0002105)                                                 | ✓         |
| 121 | Sneeze (HP:0025095)                                                     | ✓         |
| 122 | Wheezing (HP:0030828)                                                   | ✓         |
| 123 | Abnormal pulmonary thoracic imaging finding (HP:0031983)                | -         |
| 124 | Centrilobular ground-glass opacification on pulmonary HRCT (HP:0025180) | -         |
| 125 | Crazy-paving pattern (HP:0033659)                                       | -         |
| 126 | Interlobular septal thickening (HP:0030879)                             | -         |
| 127 | Parenchymal consolidation (HP:0032177)                                  | -         |
| 128 | Pleural thickening (HP:0031944)                                         | -         |
| 129 | Pulmonary bulla (HP:0032446)                                            | -         |
| 130 | Pulmonary interstitial thickening (HP:0033711)                          | -         |
| 131 | Reticular pattern on pulmonary HRCT (HP:0025390)                        | -         |
| 132 | Solid pulmonary nodule (HP:0033609)                                     | -         |
| 133 | Subsolid pulmonary nodule (HP:0033610)                                  | -         |
| 134 | Subpleural curvilinear line (HP:0033702)                                | -         |
| 135 | Airway obstruction (HP:0006536)                                         | -         |
| 136 | Decreased DLCO (HP:0045051)                                             | -         |
| 137 | Decreased maximal oxygen uptake (HP:0033760)                            | -         |
| 138 | Decreased RV/TLC ratio (HP:0033773)                                     | -         |
| 139 | Ground-glass opacification (HP:0025179)                                 | -         |
| 140 | Oxygen desaturation on exertion (HP:0030874)                            | -         |
| 141 | Reduced FEV1/FVC ratio (HP:0030877)                                     | -         |
| 142 | Reduced forced expiratory volume in one second (HP:0032342)             | -         |
| 143 | Reduced forced vital capacity (HP:0032341)                              | -         |
| 144 | Reduced functional residual capacity (HP:0033750)                       | -         |
| 145 | Reduced residual volume (HP:0033753)                                    | -         |
| 146 | Reduced total lung capacity (HP:0033169)                                | -         |
| 147 | Restrictive ventilatory defect (HP:0002091)                             | -         |
| 148 | Exertional dyspnea (HP:0002875)                                         | -         |
| 149 | Increased sputum production (HP:0033709)                                | -         |
| 150 | Nonproductive cough (HP:0031246)                                        | -         |
| 151 | Pleuritic chest pain (HP:0033771)                                       | -         |
| 152 | Productive cough (HP:0031245)                                           | -         |
| 153 | Rest dyspnea (HP:0033710)                                               | -         |
| 154 | Rhinorrhea (HP:0031417)                                                 | -         |
| 155 | Rhonchi (HP:0030831)                                                    | -         |
| 156 | Tachypnea (HP:0002789)                                                  | -         |

**Table S5. Endocrine HPO terms that were observed (✓) or not (-) in the EHR data.**

|     | <b>Term</b>                                       | <b>observed?</b> |
|-----|---------------------------------------------------|------------------|
| 157 | Diabetes mellitus (HP:0000819)                    | ✓                |
| 158 | Edema (HP:0000969)                                | ✓                |
| 159 | Fever (HP:0001945)                                | ✓                |
| 160 | Hypothermia (HP:0002045)                          | ✓                |
| 161 | Irregular menstruation (HP:0000858)               | ✓                |
| 162 | Menorrhagia (HP:0000132)                          | ✓                |
| 163 | Renal insufficiency (HP:0000083)                  | ✓                |
| 164 | Urinary incontinence (HP:0000020)                 | ✓                |
| 165 | Decreased glomerular filtration rate (HP:0012213) | -                |
| 166 | Female sexual dysfunction (HP:0030014)            | -                |
| 167 | Heat intolerance (HP:0002046)                     | -                |
| 168 | Low-grade fever (HP:0011134)                      | -                |
| 169 | Male sexual dysfunction (HP:0040307)              | -                |
| 170 | Pancreatitis (HP:0001733)                         | -                |
| 171 | Postmenopausal bleeding (HP:0033840)              | -                |
| 172 | Recurrent fever (HP:0001954)                      | -                |
| 173 | Temperature instability (HP:0005968)              | -                |
| 174 | Testicular pain (HP:0033839)                      | -                |

**Table S6. Immunology** HPO terms that were observed (✓) or not (-) in the EHR data.

|     | <b>Term</b>                                              | <b>observed?</b> |
|-----|----------------------------------------------------------|------------------|
| 175 | Anaphylactic shock (HP:0100845)                          | ✓                |
| 176 | Lymphadenopathy (HP:0002716)                             | ✓                |
| 177 | Lymphopenia (HP:0001888)                                 | ✓                |
| 178 | Antinuclear antibody positivity (HP:0003493)             | -                |
| 179 | Anti-thyroid peroxidase antibody positivity (HP:0025379) | -                |
| 180 | Anti-thyroglobulin antibody positivity (HP:0032069)      | -                |

**Table S7. General HPO terms that were observed (✓) or not (-) in the EHR data.**

|     | <b>Term</b>                                            | <b>observed?</b> |
|-----|--------------------------------------------------------|------------------|
| 181 | Arthritis (HP:0001369)                                 | ✓                |
| 182 | Asthenia (HP:0025406)                                  | ✓                |
| 183 | Difficulty walking (HP:0002355)                        | ✓                |
| 184 | Fatigue (HP:0012378)                                   | ✓                |
| 185 | Shivering (HP:0025144)                                 | ✓                |
| 186 | Xerostomia (HP:0000217)                                | ✓                |
| 187 | Arthralgia (HP:0002829)                                | ✓                |
| 188 | Chest pain (HP:0100749)                                | ✓                |
| 189 | Limb pain (HP:0009763)                                 | ✓                |
| 190 | Myalgia (HP:0003326)                                   | ✓                |
| 191 | Pain (HP:0012531)                                      | ✓                |
| 192 | Chest tightness (HP:0031352)                           | -                |
| 193 | Chills (HP:0025143)                                    | -                |
| 194 | Coldness (HP:0033850)                                  | -                |
| 195 | Diminished health-related quality of life (HP:0033665) | -                |
| 196 | Diminished mental health (HP:0033667)                  | -                |
| 197 | Diminished physical functioning (HP:0033666)           | -                |
| 198 | Exercise intolerance (HP:0003546)                      | -                |
| 199 | Frailty (HP:0033675)                                   | -                |
| 200 | Impaired ability to bathe oneself (HP:0031059)         | -                |
| 201 | Impaired ability to dress oneself (HP:0031060)         | -                |
| 202 | Impairment of activities of daily living (HP:0031058)  | -                |
| 203 | Malaise (HP:0033834)                                   | -                |
| 204 | Night sweats (HP:0030166)                              | -                |
| 205 | Occupational disability (HP:0033695)                   | -                |
| 206 | Postexertional malaise (HP:0030973)                    | -                |
| 207 | Stiff neck (HP:0025258)                                | -                |
| 208 | Weight loss (HP:0001824)                               | -                |
| 209 | Body ache (HP:0033047)                                 | -                |
| 210 | Bone pain (HP:0002653)                                 | -                |
| 211 | Intrascapular pain (HP:0033746)                        | -                |
| 212 | Neuralgia (HP:0033345)                                 | -                |



**Table S8. Cardiovascular HPO terms that were observed (✓) or not (-) in the EHR data.**

|     | <b>Term</b>                                                  | <b>observed?</b> |
|-----|--------------------------------------------------------------|------------------|
| 213 | Bradycardia (HP:0001662)                                     | ✓                |
| 214 | Hypotension (HP:0002615)                                     | ✓                |
| 215 | Myocarditis (HP:0012819)                                     | ✓                |
| 216 | Tachycardia (HP:0001649)                                     | ✓                |
| 217 | Angina pectoris (HP:0001681)                                 | ✓                |
| 218 | Palpitations (HP:0001962)                                    | ✓                |
| 219 | Elevated myocardial native T1 (HP:4000006)                   | -                |
| 220 | Elevated myocardial native T2 (HP:4000003)                   | -                |
| 221 | Hypertension (HP:0000822)                                    | -                |
| 222 | Increased circulating troponin T concentration (HP:0410174)  | -                |
| 223 | Increased circulating troponin I concentration (HP:0410173)  | -                |
| 224 | Increased heart rate variability (HP:0031862)                | -                |
| 225 | Increased left ventricular end-diastolic volume (HP:0033755) | -                |
| 226 | Myocardial late gadolinium enhancement (HP:4000004)          | -                |
| 227 | Pericardial effusion (HP:0001698)                            | -                |
| 228 | Pericardial late gadolinium enhancement (HP:4000005)         | -                |
| 229 | Reduced ejection fraction (HP:0012664)                       | -                |
| 230 | Venous thrombosis (HP:0004936)                               | -                |
| 231 | Stroke (HP:0001297)                                          | -                |
| 232 | Syncope (HP:0001279)                                         | -                |

**Table S9. Gastrointestinal HPO terms that were observed (✓) or not (-) in the EHR data.**

|     | <b>Term</b>                          | <b>observed?</b> |
|-----|--------------------------------------|------------------|
| 233 | Gastroesophageal reflux (HP:0002020) | ✓                |
| 234 | Gastroparesis (HP:0002578)           | ✓                |
| 235 | Hepatic steatosis (HP:0001397)       | ✓                |
| 236 | Hepatomegaly (HP:0002240)            | ✓                |
| 237 | Hepatitis (HP:0012115)               | ✓                |
| 238 | Malnutrition (HP:0004395)            | ✓                |
| 239 | Splenomegaly (HP:0001744)            | ✓                |
| 240 | Abdominal pain (HP:0002027)          | ✓                |
| 241 | Bowel incontinence (HP:0002607)      | ✓                |
| 242 | Constipation (HP:0002019)            | ✓                |
| 243 | Diarrhea (HP:0002014)                | ✓                |
| 244 | Nausea (HP:0002018)                  | ✓                |
| 245 | Vomiting (HP:0002013)                | ✓                |
| 246 | Gastric ulcer (HP:0002592)           | -                |
| 247 | Pancreatic steatosis (HP:0033757)    | -                |
| 248 | Abdominal symptom (HP:0011458)       | -                |
| 249 | Anorexia (HP:0002039)                | -                |
| 250 | Early satiety (HP:0033842)           | -                |
| 251 | Poor appetite (HP:0004396)           | -                |

**Table S10. Laboratory HPO terms that were observed (✓) or not (-) in the EHR data.**

|     | <b>Term</b>                                                                 | <b>observed?</b> |
|-----|-----------------------------------------------------------------------------|------------------|
| 252 | Decreased circulating calcifediol concentration (HP:0012053)                | ✓                |
| 253 | Elevated circulating alkaline phosphatase concentration (HP:0003155)        | ✓                |
| 254 | Elevated circulating alanine aminotransferase concentration (HP:0031964)    | ✓                |
| 255 | Elevated circulating aspartate aminotransferase concentration (HP:0031956)  | ✓                |
| 256 | Elevated circulating creatinine concentration (HP:0003259)                  | ✓                |
| 257 | Elevated circulating creatine kinase concentration (HP:0003236)             | ✓                |
| 258 | Elevated circulating thyroid-stimulating hormone concentration (HP:0002925) | ✓                |
| 259 | Elevated erythrocyte sedimentation rate (HP:0003565)                        | ✓                |
| 260 | Elevated gamma-glutamyltransferase level (HP:0030948)                       | ✓                |
| 261 | Hypocalcemia (HP:0002901)                                                   | ✓                |
| 262 | Hypofibrinogenemia (HP:0011900)                                             | ✓                |
| 263 | Hyperglycemia (HP:0003074)                                                  | ✓                |
| 264 | Hypoglycemia (HP:0001943)                                                   | ✓                |
| 265 | Hypophosphatemia (HP:0002148)                                               | ✓                |
| 266 | Increased circulating ferritin concentration (HP:0003281)                   | ✓                |
| 267 | Thrombocytopenia (HP:0001873)                                               | ✓                |
| 268 | Elevated circulating C-reactive protein concentration (HP:0011227)          | -                |
| 269 | Elevated circulating D-dimer concentration (HP:0033106)                     | -                |
| 270 | Elevated circulating soluble CD25 concentration (HP:0033833)                | -                |
| 271 | Increased circulating interleukin 6 (HP:0030783)                            | -                |
| 272 | Increased circulating lactate dehydrogenase concentration (HP:0025435)      | -                |
| 273 | Increased circulating NT-proBNP concentration (HP:0031185)                  | -                |
| 274 | Increased circulating procalcitonin concentration (HP:0032308)              | -                |

**Table S11.** Eye HPO terms that were observed (✓) or not (-) in the EHR data.

|     | <b>Term</b>                               | <b>observed?</b> |
|-----|-------------------------------------------|------------------|
| 275 | Conjunctivitis (HP:0000509)               | ✓                |
| 276 | Diplopia (HP:0000651)                     | ✓                |
| 277 | Keratoconjunctivitis sicca (HP:0001097)   | ✓                |
| 278 | Ocular pain (HP:0200026)                  | ✓                |
| 279 | Vitreous floaters (HP:0100832)            | ✓                |
| 280 | Blindness (HP:0000618)                    | -                |
| 281 | Blurred vision (HP:0000622)               | -                |
| 282 | Gaze-evoked nystagmus (HP:0000640)        | -                |
| 283 | Ocular pruritus (HP:0033841)              | -                |
| 284 | Peripheral visual field loss (HP:0007994) | -                |
| 285 | Photophobia (HP:0000613)                  | -                |
| 286 | Red eye (HP:0025337)                      | -                |
| 287 | Visual loss (HP:0000572)                  | -                |

| Covariate                     | Sig.? |
|-------------------------------|-------|
| AKI                           | ✓     |
| Chronic lung disease          | ✓     |
| Congestive heart failure      | ✓     |
| Coronary artery disease       | ✓     |
| Depression                    | ✓     |
| Diabetes (complicated)        | ✓     |
| Diabetes (uncomplicated)      | ✓     |
| Heart failure                 | ✓     |
| Hypertension                  | ✓     |
| Kidney disease                | ✓     |
| Obesity                       | ✓     |
| Peripheral vascular disease   | ✓     |
| Systemic corticosteroids      | ✓     |
| At least one vaccine recorded | -     |
| Cardiomyopathies              | -     |
| Cerebrovascular disease       | -     |
| Dementia                      | -     |
| Down syndrome                 | -     |
| Hemiplegia or paraplegia      | -     |
| HIV infection                 | -     |
| Malignant cancer              | -     |
| Metastatic solid tumor cancer | -     |
| Mild liver disease            | -     |
| Moderate liver disease        | -     |
| Multiple sclerosis            | -     |
| Myocardial infarction         | -     |
| Obstructive sleep apnea       | -     |
| Peptic ulcer                  | -     |
| Psychosis                     | -     |
| Sickle cell disease           | -     |
| Substance abuse               | -     |
| Thalassemia                   | -     |
| Tobacco smoker                | -     |
| Tuberculosis                  | -     |
| Rheumatological disease       | -     |

**Table S12. Covariates assessed prior to acute COVID-19.** The statistically significant covariates are shown in the main manuscript. n.s.: non-significant. ✓: statistically significant with Bonferroni-corrected  $p < 0.05$ . Abbreviations: AKI: acute kidney injury. IMV: Invasive mechanical ventilation.

| Covariate                              | Sig.? |
|----------------------------------------|-------|
| AKI                                    | ✓     |
| IMV                                    | ✓     |
| COVID regimen corticosteroids          | ✓     |
| Sepsis                                 | ✓     |
| Vasopressors                           | ✓     |
| Remdesivir                             | ✓     |
| Death during COVID hospitalization     | -     |
| ECMO                                   | -     |
| COVID diagnosis during hospitalization | -     |

**Table S13. Covariates assessed during acute COVID-19.** The statistically significant covariates are shown in the main manuscript. n.s.: non-significant. ✓: statistically significant with Bonferroni-corrected  $p < 0.05$ . Abbreviations: AKI: acute kidney injury. IMV: Invasive mechanical ventilation.

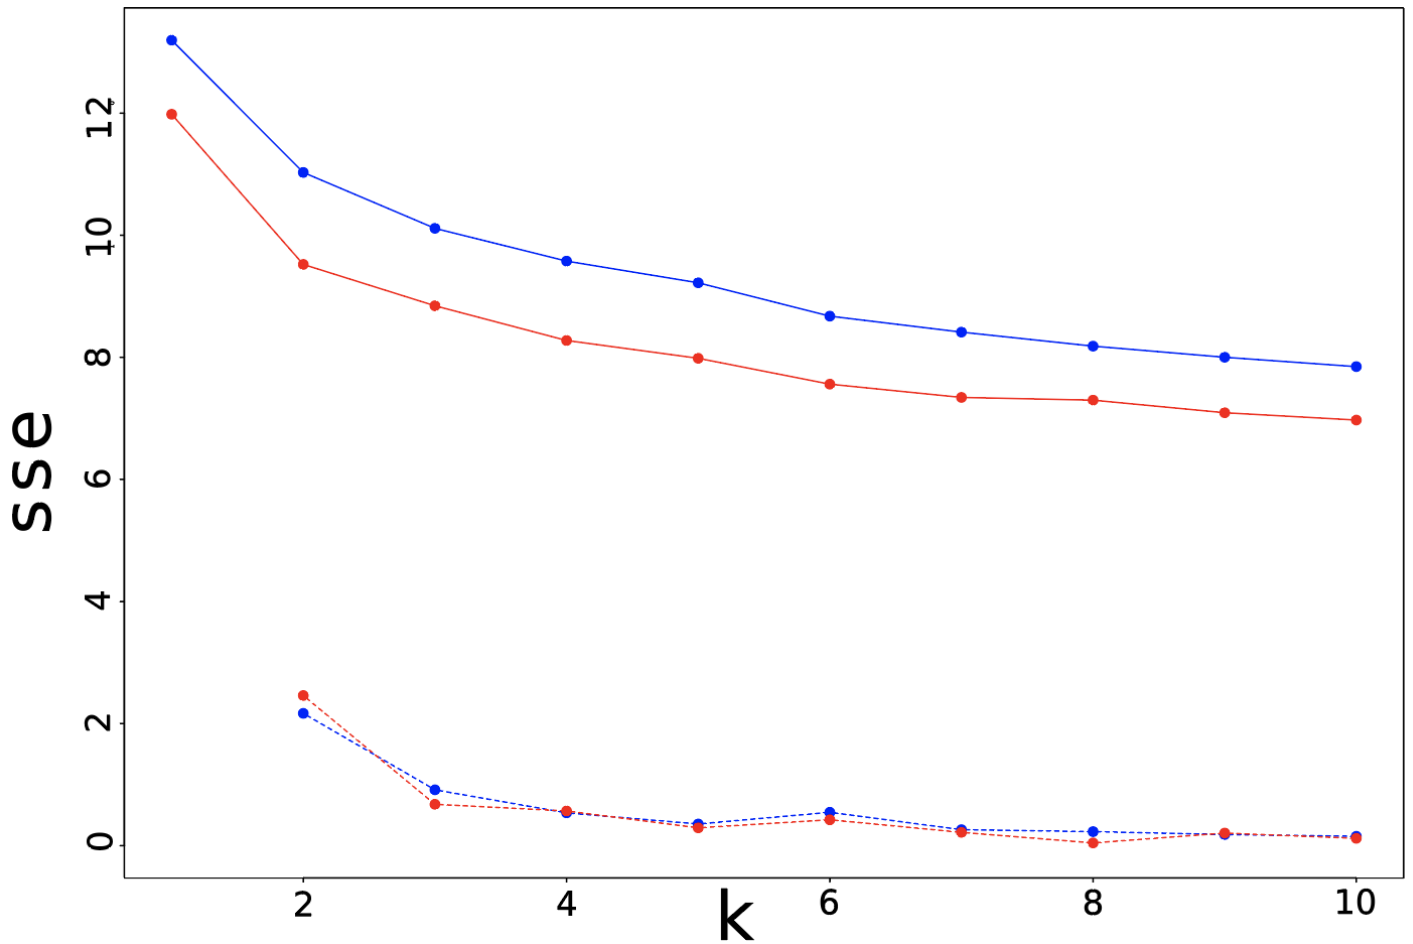

**Figure S1. Determination of optimal k using the elbow method.** For patients from data partner 1 (blue) or data partners 2 - 5 (red), patients were clustered with the k-means algorithm using values of k shown on the x-axis. For each value of k, the sum of squared error (SSE) ( $\times 10^4$ ) of the distance from each patient to the centroid of the patient's cluster (solid lines) and the decrease in SSE ( $\times 10^4$ ) from the previous k (dotted lines) is shown on the y-axis.

| HPO                     | Cluster 1 | Cluster 2 | Cluster 3 | Cluster 4 |
|-------------------------|-----------|-----------|-----------|-----------|
| Vertigo                 | 28.4%     | 8.2%      | 7.7%      | 18.1%     |
| Hypotension             | 21.8%     | 16.0%     | 1.3%      | 2.4%      |
| Palpitations            | 22.6%     | 2.4%      | 3.0%      | 15.5%     |
| Tachycardia             | 49.4%     | 17.4%     | 3.0%      | 16.0%     |
| Fever                   | 40.6%     | 19.5%     | 5.4%      | 10.8%     |
| Diarrhea                | 38.3%     | 15.4%     | 4.7%      | 5.2%      |
| Nausea                  | 24.5%     | 7.2%      | 3.4%      | 6.8%      |
| Asthenia                | 39.5%     | 18.4%     | 2.0%      | 8.4%      |
| Chest pain              | 49.8%     | 8.9%      | 0.0%      | 49.3%     |
| Fatigue                 | 64.8%     | 23.5%     | 4.0%      | 56.4%     |
| Myalgia                 | 29.1%     | 3.8%      | 0.0%      | 20.2%     |
| Pain                    | 77.8%     | 19.8%     | 2.3%      | 72.7%     |
| Lymphopenia             | 46.7%     | 61.8%     | 2.7%      | 4.2%      |
| Elevated ALP            | 25.7%     | 21.8%     | 1.3%      | 1.0%      |
| Elevated ASAT           | 46.7%     | 53.6%     | 0.7%      | 1.3%      |
| Elevated creatinine     | 29.1%     | 38.9%     | 2.3%      | 1.8%      |
| Hyperglycemia           | 77.4%     | 78.8%     | 20.5%     | 26.8%     |
| Hypocalcemia            | 62.5%     | 72.4%     | 1.0%      | 3.4%      |
| Increased ferritin      | 18.4%     | 20.1%     | 0.0%      | 0.3%      |
| Thrombocytopenia        | 30.7%     | 35.8%     | 1.7%      | 1.6%      |
| Abnormality of movement | 20.7%     | 3.8%      | 7.7%      | 7.6%      |
| Depression              | 21.8%     | 8.9%      | 8.7%      | 7.3%      |
| Headache                | 36.8%     | 6.5%      | 14.1%     | 23.4%     |
| Insomnia                | 23.0%     | 8.5%      | 8.1%      | 8.7%      |
| Cough                   | 59.8%     | 25.3%     | 44.0%     | 36.7%     |
| Hypoxemia               | 69.7%     | 64.5%     | 17.8%     | 17.3%     |

**Figure S2. Summary of phenotypic feature distribution in the four clusters.** HPO terms are shown if Pearson's chi-squared test on the numbers of patients in each category with the feature was significant with  $p < 0.00001$  and if at least 20% of patients in at least one cluster had the feature. Terms are grouped in categories shown color coded on the left.



| HPO                     | Cluster 1 | Cluster 2 | Cluster 3 | Cluster 4 | Cluster 5 |
|-------------------------|-----------|-----------|-----------|-----------|-----------|
| Vertigo                 | 27.6%     | 8.2%      | 19.1%     | 19.7%     | 2.2%      |
| Hypotension             | 22.4%     | 16.1%     | 1.9%      | 2.6%      | 1.7%      |
| Palpitations            | 21.7%     | 2.5%      | 3.7%      | 19.7%     | 2.2%      |
| Tachycardia             | 47.6%     | 17.9%     | 4.3%      | 20.7%     | 3.5%      |
| Fever                   | 39.8%     | 20.4%     | 2.5%      | 12.9%     | 7.9%      |
| Diarrhea                | 38.6%     | 15.8%     | 9.3%      | 6.1%      | 1.3%      |
| Nausea                  | 24.4%     | 7.9%      | 7.4%      | 7.1%      | 1.3%      |
| Asthenia                | 40.9%     | 19.4%     | 6.2%      | 6.1%      | 3.5%      |
| Chest pain              | 48.4%     | 9.3%      | 4.3%      | 60.5%     | 0.4%      |
| Fatigue                 | 64.6%     | 24.4%     | 25.3%     | 50.5%     | 15.7%     |
| Myalgia                 | 29.1%     | 3.9%      | 3.1%      | 23.9%     | 0.0%      |
| Pain                    | 77.2%     | 20.1%     | 14.8%     | 85.1%     | 2.6%      |
| Lymphopenia             | 48.0%     | 62.7%     | 5.6%      | 4.2%      | 3.5%      |
| Elevated ALP            | 25.6%     | 22.2%     | 1.2%      | 1.9%      | 1.7%      |
| Elevated ASAT           | 48.0%     | 55.6%     | 0.6%      | 1.6%      | 1.3%      |
| Elevated creatinine     | 30.3%     | 40.5%     | 4.3%      | 1.3%      | 1.3%      |
| Hyperglycemia           | 79.1%     | 77.8%     | 16.0%     | 27.8%     | 28.8%     |
| Hypocalcemia            | 63.4%     | 74.9%     | 1.2%      | 4.9%      | 1.7%      |
| Increased ferritin      | 18.9%     | 21.1%     | 0.0%      | 0.3%      | 0.0%      |
| Thrombocytopenia        | 31.1%     | 37.3%     | 4.9%      | 1.3%      | 0.4%      |
| Abnormality of movement | 20.9%     | 3.2%      | 19.1%     | 6.5%      | 1.7%      |
| Depression              | 23.2%     | 8.2%      | 26.5%     | 3.9%      | 0.0%      |
| Headache                | 37.4%     | 6.1%      | 32.7%     | 22.0%     | 5.7%      |
| Insomnia                | 24.0%     | 8.6%      | 7.4%      | 8.7%      | 7.9%      |
| Cough                   | 59.1%     | 24.7%     | 15.4%     | 38.8%     | 59.8%     |
| Hypoxemia               | 70.5%     | 64.5%     | 9.3%      | 18.8%     | 25.3%     |

**Figure S3. Summary of phenotypic feature distribution in the five clusters.** HPO terms are shown if Pearson's chi-squared test on the numbers of patients in each category with the feature was significant with  $p < 0.00001$  and if at least 20% of patients in at least one cluster had the feature. Terms are grouped in categories shown color coded on the left.
